# Supplementary material
Source: publisher figshare collection journal article supplement (https://tandf.figshare.com/articles/dataset/_/24793174)

# Appendix 3 Post-Klark Feedback Survey

Thank you for participating in this study. The survey will take approximately 5 minutes to complete.

\* Required

1. Participant Unique ID \*

# History-taking

Please assume an adult patient has reasonable motivation to participate and sufficient cognition to respond.

2. How would you rate your ability to take a focused history from an adult patient who has presented with?

|                       | Very Bad              | Bad                   | Less than Fair        | Fair                  | More than Fair        | Good                  | Very Good             |
|-----------------------|-----------------------|-----------------------|-----------------------|-----------------------|-----------------------|-----------------------|-----------------------|
| Abdominal pain        | <input type="radio"/> |
| Breathlessness        | <input type="radio"/> |
| Chest pain            | <input type="radio"/> |
| Fatigue               | <input type="radio"/> |
| Headache              | <input type="radio"/> |
| Jaundice              | <input type="radio"/> |
| Loss of consciousness | <input type="radio"/> |
| A lump or lumps       | <input type="radio"/> |
| Nausea and vomiting   | <input type="radio"/> |
| Urinary retention     | <input type="radio"/> |

3. To what extent do you agree with this statement?:

"I feel confident to take a history from an adult patient who has presented with this."

|                       | Strongly<br>disagree  | Disagree              | Somewhat<br>disagree  | Neither<br>agree nor<br>disagree | Somewhat<br>agree     | Agree                 | Strongly<br>agree     |
|-----------------------|-----------------------|-----------------------|-----------------------|----------------------------------|-----------------------|-----------------------|-----------------------|
| Abdominal pain        | <input type="radio"/> | <input type="radio"/> | <input type="radio"/> | <input type="radio"/>            | <input type="radio"/> | <input type="radio"/> | <input type="radio"/> |
| Breathlessness        | <input type="radio"/> | <input type="radio"/> | <input type="radio"/> | <input type="radio"/>            | <input type="radio"/> | <input type="radio"/> | <input type="radio"/> |
| Chest pain            | <input type="radio"/> | <input type="radio"/> | <input type="radio"/> | <input type="radio"/>            | <input type="radio"/> | <input type="radio"/> | <input type="radio"/> |
| Fatigue               | <input type="radio"/> | <input type="radio"/> | <input type="radio"/> | <input type="radio"/>            | <input type="radio"/> | <input type="radio"/> | <input type="radio"/> |
| Headache              | <input type="radio"/> | <input type="radio"/> | <input type="radio"/> | <input type="radio"/>            | <input type="radio"/> | <input type="radio"/> | <input type="radio"/> |
| Jaundice              | <input type="radio"/> | <input type="radio"/> | <input type="radio"/> | <input type="radio"/>            | <input type="radio"/> | <input type="radio"/> | <input type="radio"/> |
| Loss of consciousness | <input type="radio"/> | <input type="radio"/> | <input type="radio"/> | <input type="radio"/>            | <input type="radio"/> | <input type="radio"/> | <input type="radio"/> |
| A lump or lumps       | <input type="radio"/> | <input type="radio"/> | <input type="radio"/> | <input type="radio"/>            | <input type="radio"/> | <input type="radio"/> | <input type="radio"/> |
| Nausea and vomiting   | <input type="radio"/> | <input type="radio"/> | <input type="radio"/> | <input type="radio"/>            | <input type="radio"/> | <input type="radio"/> | <input type="radio"/> |
| Urinary retention     | <input type="radio"/> | <input type="radio"/> | <input type="radio"/> | <input type="radio"/>            | <input type="radio"/> | <input type="radio"/> | <input type="radio"/> |

4. How would you rate your communication skills while taking a history from an adult patient?

|           | 1                     | 2                     | 3                     | 4                     | 5                     | 6                     | 7                     |           |
|-----------|-----------------------|-----------------------|-----------------------|-----------------------|-----------------------|-----------------------|-----------------------|-----------|
| Very poor | <input type="radio"/> | Very good |

## Experience of Klark

5. How helpful did you find Klark?

|                |                       |                       |                       |                       |                       |                       |                       |              |
|----------------|-----------------------|-----------------------|-----------------------|-----------------------|-----------------------|-----------------------|-----------------------|--------------|
|                | 1                     | 2                     | 3                     | 4                     | 5                     | 6                     | 7                     |              |
| Very unhelpful | <input type="radio"/> | Very helpful |

6. Would you consider using Klark to prepare for real clinical encounters with patients?

|               |                       |                       |                       |                       |                       |                       |                       |             |
|---------------|-----------------------|-----------------------|-----------------------|-----------------------|-----------------------|-----------------------|-----------------------|-------------|
|               | 1                     | 2                     | 3                     | 4                     | 5                     | 6                     | 7                     |             |
| Very unlikely | <input type="radio"/> | Very likely |

7. How likely are you to recommend Klark to other students?

|               |                       |                       |                       |                       |                       |                       |                       |             |
|---------------|-----------------------|-----------------------|-----------------------|-----------------------|-----------------------|-----------------------|-----------------------|-------------|
|               | 1                     | 2                     | 3                     | 4                     | 5                     | 6                     | 7                     |             |
| Very unlikely | <input type="radio"/> | Very likely |

8. How relatable is the clerking experience on Klark compared to real life?

|                  |                       |                       |                       |                       |                       |                       |                       |                |
|------------------|-----------------------|-----------------------|-----------------------|-----------------------|-----------------------|-----------------------|-----------------------|----------------|
|                  | 1                     | 2                     | 3                     | 4                     | 5                     | 6                     | 7                     |                |
| Very unrealistic | <input type="radio"/> | Very realistic |

9. To what extent has using Klark changed your approach to taking histories from real patients with similar presentations?

|            |                       |                       |                       |                       |                       |                       |                       |           |
|------------|-----------------------|-----------------------|-----------------------|-----------------------|-----------------------|-----------------------|-----------------------|-----------|
|            | 1                     | 2                     | 3                     | 4                     | 5                     | 6                     | 7                     |           |
| Not at all | <input type="radio"/> | Very much |

10. Please could you explain your answer to the above questions (the extent Klark changed your approach to taking histories)?

11. Which feature(s) did you find most useful about using Klark?

12. If you could add to or change one thing about Klark, what would it be?

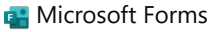

Supplement: Supplementary file 2 [file 1]
