# Supplementary material
Source: publisher figshare collection journal article supplement (https://tandf.figshare.com/articles/dataset/_/24793174)
Supplement: Supplementary file 1 [file 1]

# Appendix 2 Baseline History-taking Survey

Thank you for participating in this study. The survey will take approximately 5 minutes to complete.

\* Required

1. Participant Unique ID \*

## History-taking

Please assume an adult patient has reasonable motivation to participate and sufficient cognition to respond.

2. How would you rate your ability to take a focused history from an adult patient who has presented with?

|                       | Very Bad              | Bad                   | Less than<br>Fair     | Fair                  | More than<br>Fair     | Good                  | Very Good             |
|-----------------------|-----------------------|-----------------------|-----------------------|-----------------------|-----------------------|-----------------------|-----------------------|
| Abdominal pain        | <input type="radio"/> |
| Breathlessness        | <input type="radio"/> |
| Chest pain            | <input type="radio"/> |
| Fatigue               | <input type="radio"/> |
| Headache              | <input type="radio"/> |
| Jaundice              | <input type="radio"/> |
| Loss of Consciousness | <input type="radio"/> |
| A lump or lumps       | <input type="radio"/> |
| Nausea and vomiting   | <input type="radio"/> |
| Urinary retention     | <input type="radio"/> |

3. To what extent do you agree with this statement?:

"I feel confident to take a history from an adult patient who has presented with this."

|                       | Strongly<br>disagree  | Disagree              | Somewhat<br>disagree  | Neither<br>agree nor<br>disagree | Somewhat<br>agree     | Agree                 | Strongly<br>agree     |
|-----------------------|-----------------------|-----------------------|-----------------------|----------------------------------|-----------------------|-----------------------|-----------------------|
| Abdominal pain        | <input type="radio"/> | <input type="radio"/> | <input type="radio"/> | <input type="radio"/>            | <input type="radio"/> | <input type="radio"/> | <input type="radio"/> |
| Breathlessness        | <input type="radio"/> | <input type="radio"/> | <input type="radio"/> | <input type="radio"/>            | <input type="radio"/> | <input type="radio"/> | <input type="radio"/> |
| Chest pain            | <input type="radio"/> | <input type="radio"/> | <input type="radio"/> | <input type="radio"/>            | <input type="radio"/> | <input type="radio"/> | <input type="radio"/> |
| Fatigue               | <input type="radio"/> | <input type="radio"/> | <input type="radio"/> | <input type="radio"/>            | <input type="radio"/> | <input type="radio"/> | <input type="radio"/> |
| Headache              | <input type="radio"/> | <input type="radio"/> | <input type="radio"/> | <input type="radio"/>            | <input type="radio"/> | <input type="radio"/> | <input type="radio"/> |
| Jaundice              | <input type="radio"/> | <input type="radio"/> | <input type="radio"/> | <input type="radio"/>            | <input type="radio"/> | <input type="radio"/> | <input type="radio"/> |
| Loss of Consciousness | <input type="radio"/> | <input type="radio"/> | <input type="radio"/> | <input type="radio"/>            | <input type="radio"/> | <input type="radio"/> | <input type="radio"/> |
| A lump or lumps       | <input type="radio"/> | <input type="radio"/> | <input type="radio"/> | <input type="radio"/>            | <input type="radio"/> | <input type="radio"/> | <input type="radio"/> |
| Nausea and vomiting   | <input type="radio"/> | <input type="radio"/> | <input type="radio"/> | <input type="radio"/>            | <input type="radio"/> | <input type="radio"/> | <input type="radio"/> |
| Urinary retention     | <input type="radio"/> | <input type="radio"/> | <input type="radio"/> | <input type="radio"/>            | <input type="radio"/> | <input type="radio"/> | <input type="radio"/> |

4. How would you rate your communication skills while taking a history from an adult patient?

|           | 1                     | 2                     | 3                     | 4                     | 5                     | 6                     | 7                     |           |
|-----------|-----------------------|-----------------------|-----------------------|-----------------------|-----------------------|-----------------------|-----------------------|-----------|
| Very Poor | <input type="radio"/> | Very Good |

## Prior experience

5. Have you had any experience of using virtual tools and simulation in your medical education so far?

☐ Yes

☐ No

6. How useful do you find virtual tools and simulation in learning medicine and/or surgery?

Very Unhelpful      1      2      3      4      5      6      7      Very Helpful  
☐   ☐   ☐   ☐   ☐   ☐   ☐

7. How much opportunity have you had to take histories from patients in your clinical placements so far?

None      1      2      3      4      5      6      7      A Lot  
☐   ☐   ☐   ☐   ☐   ☐   ☐

8. How much prior teaching have you received on history-taking?

☐ Less than 1 hour

☐ 1 to 3 hours

☐ 3 to 5 hours

☐ 5 to 7 hours

☐ 7 to 10 hours

☐ More than 10 hours

9. How would you describe the ways you learn best in medical school?  
Please select all that apply.

- ☐ Visually
- ☐ Listening/aurally
- ☐ Reading and writing
- ☐ By doing (kinaesthetically)

---

This content is neither created nor endorsed by Microsoft. The data you submit will be sent to the form owner.

 Microsoft Forms
